# Supplementary material for: Zinc finger protein 91 (ZFP91) activates HIF-1α via NF-κB/p65 to promote proliferation and tumorigenesis of colon cancer
Source: PubMed Central journal article supplement (PMC5095020; doi:10.18632/oncotarget.9070), 2016-04-28
Supplement: oncotarget-07-36551-s001.pdf [file oncotarget-07-36551-s001.pdf]

## SUPPLEMENTARY FIGURES AND TABLES

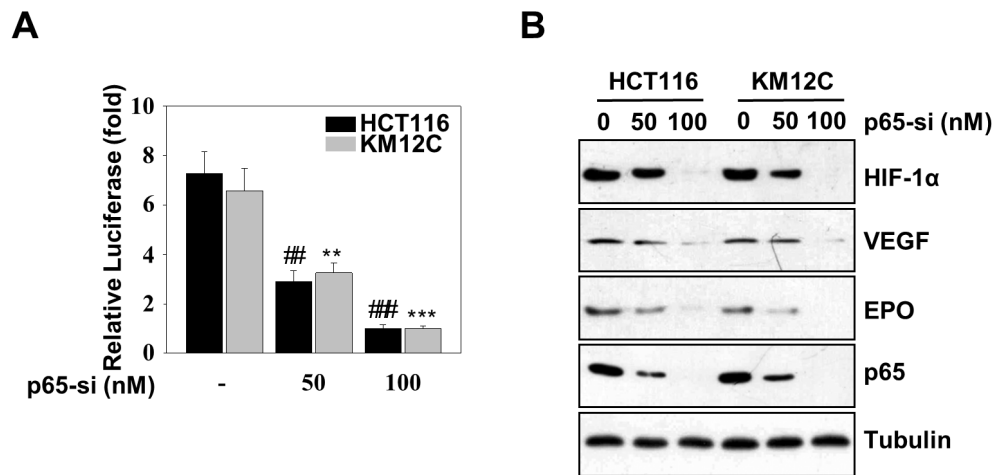

**Supplementary Figure S1:** **A.** the promoter activity of HIF-1 $\alpha$  was examined by luciferase reporter gene assay in HCT116 and KM12C cells when the cells were treated with p65 siRNA (50 or 100 nM) (\*\* $p < 0.01$ , \*\*\* $p < 0.001$ , ## $p < 0.01$ , ### $p < 0.001$ ). **B.** HCT116 and KM12C cells were treated with p65 siRNA (50 or 100 nM). The cell lysates were analyzed by immunoblot using indicated antibodies for HIF-1 $\alpha$ , VEGF, EPO, p65 and Topo-I.

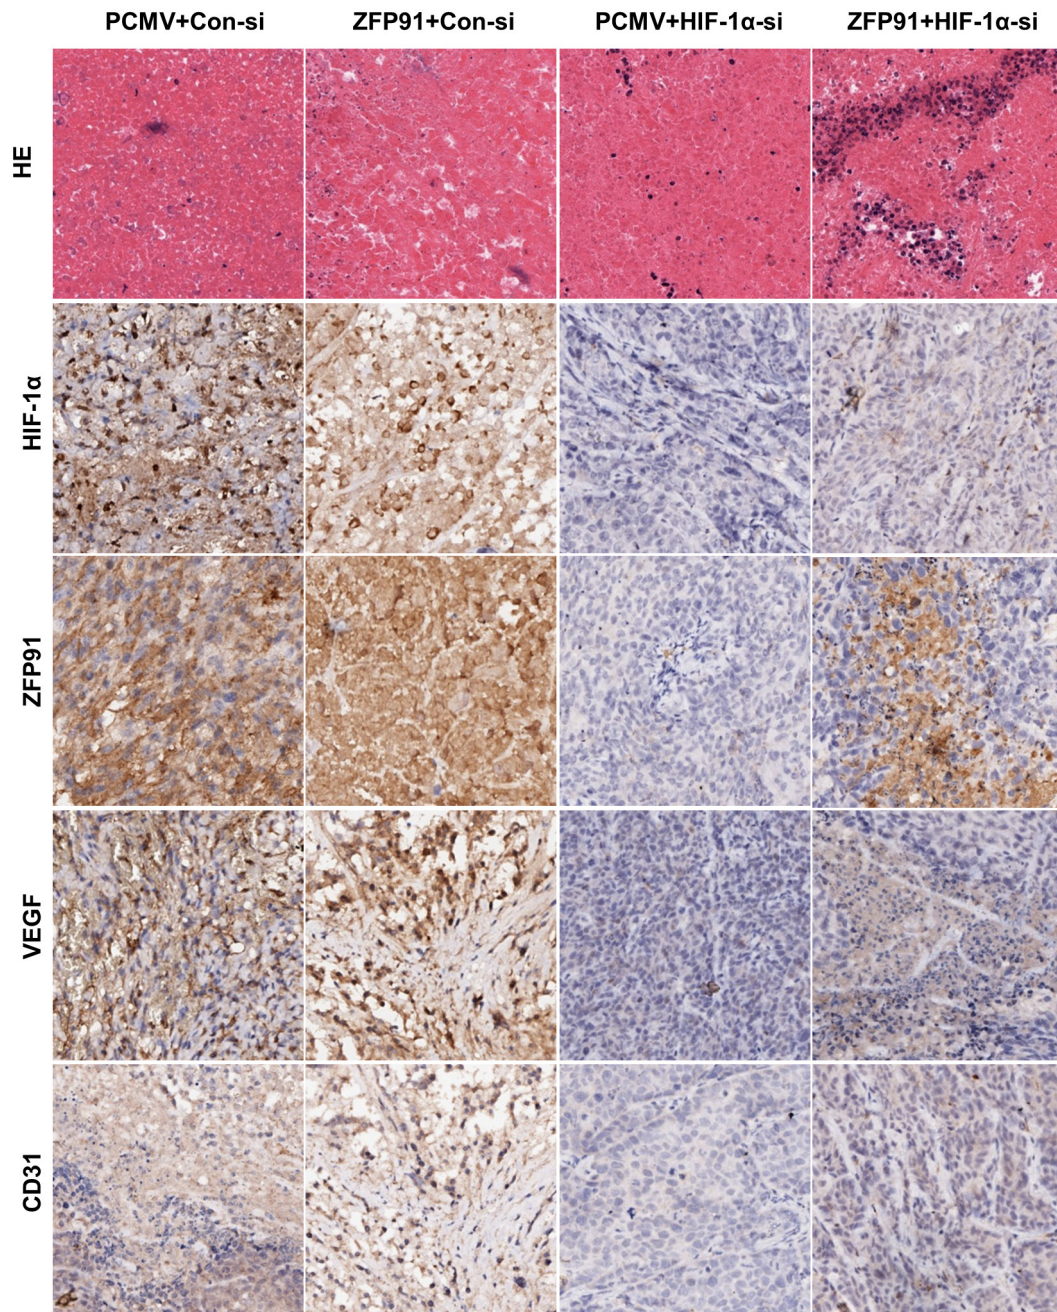

Supplementary Figure S2: H&E or IHC analysis of ZFP91, HIF-1 $\alpha$ , VEGF and CD31 expression in tumor xenograft tissues. Original magnification, 200x.

Supplementary Table S1: Correlation analysis of ZFP91 expression and clinicopathological features in colon cancer

| Variable         | ZFP91 expression |            |            | <i>p</i> value* |
|------------------|------------------|------------|------------|-----------------|
|                  | All cases        | Negative   | Positive   |                 |
| Age, y           |                  |            |            | 0.326           |
| ≤65              | 34               | 8 (23.5%)  | 26 (76.5%) |                 |
| >65              | 54               | 18 (33.3%) | 36 (66.7%) |                 |
| Sex              |                  |            |            | 0.426           |
| Male             | 45               | 15 (33.3%) | 30 (66.7%) |                 |
| Female           | 43               | 11 (25.6%) | 32 (74.4%) |                 |
| Tumor size, cm   |                  |            |            | 0.848           |
| ≤5               | 46               | 14 (30.4%) | 32 (69.6%) |                 |
| >5               | 42               | 12 (28.6%) | 30 (71.4%) |                 |
| Clinical stage   |                  |            |            | 0.020           |
| I                | 7                | 1 (14.3%)  | 6 (85.7%)  |                 |
| II               | 37               | 17 (45.9%) | 20 (54.1%) |                 |
| III              | 36               | 8 (22.2%)  | 28 (77.8%) |                 |
| IV               | 8                | 0 (0%)     | 8 (100%)   |                 |
| Differentiation  |                  |            |            | 0.386           |
| Well             | 8                | 1 (12.5%)  | 7 (87.5%)  |                 |
| Moderate         | 50               | 14 (28%)   | 36 (72%)   |                 |
| Poor             | 30               | 11 (36.7%) | 19 (63.3%) |                 |
| T classification |                  |            |            | 0.019           |
| T1               | 14               | 1 (7.1%)   | 13 (92.9%) |                 |
| T2               | 17               | 2 (11.8%)  | 15 (88.2%) |                 |
| T3               | 44               | 19 (43.2%) | 25 (56.8%) |                 |
| T4               | 13               | 4 (30.7%)  | 9 (69.3%)  |                 |
| N classification |                  |            |            | 0.049           |
| N0               | 40               | 17 (42.5%) | 23 (57.5%) |                 |
| N1               | 29               | 6 (20.7%)  | 23 (79.3%) |                 |
| N2               | 19               | 3 (15.8%)  | 16 (84.2%) |                 |
| M classification |                  |            |            | 0.055           |
| M0               | 80               | 26 (32.5%) | 54 (67.5%) |                 |
| M1               | 8                | 0 (0%)     | 8 (100%)   |                 |
| * $\chi^2$ test  |                  |            |            |                 |

Supplementary Table S2: Correlation analysis of HIF-1 $\alpha$  expression and clinicopathological features in colon cancer

| Variable         | HIF-1 $\alpha$ expression |            |            | <i>p</i> value* |
|------------------|---------------------------|------------|------------|-----------------|
|                  | All cases                 | Negative   | Positive   |                 |
| Age, y           |                           |            |            | 0.921           |
| $\leq 65$        | 34                        | 18 (52.9%) | 16 (47.1%) |                 |
| $> 65$           | 54                        | 28 (51.9%) | 26 (48.1%) |                 |
| Sex              |                           |            |            | 0.290           |
| Male             | 45                        | 26 (57.8%) | 19 (42.2%) |                 |
| Female           | 43                        | 20 (46.5%) | 23 (53.5%) |                 |
| Tumor size, cm   |                           |            |            | 0.091           |
| $\leq 5$         | 46                        | 28 (60.9%) | 18 (39.1%) |                 |
| $> 5$            | 42                        | 18 (42.9%) | 24 (57.1%) |                 |
| Clinical stage   |                           |            |            | 0.005           |
| I                | 7                         | 4 (57.1%)  | 3 (42.9%)  |                 |
| II               | 37                        | 25 (67.6%) | 12 (32.4%) |                 |
| III              | 36                        | 17 (47.2%) | 19 (52.8%) |                 |
| IV               | 8                         | 0 (0%)     | 8 (100%)   |                 |
| Differentiation  |                           |            |            | 0.246           |
| Well             | 8                         | 5 (62.5%)  | 3 (37.5%)  |                 |
| Moderate         | 50                        | 29 (58%)   | 21 (42%)   |                 |
| Poor             | 30                        | 12 (40%)   | 18 (60%)   |                 |
| T classification |                           |            |            | 0.024           |
| T1               | 14                        | 3 (21.4%)  | 11 (78.6%) |                 |
| T2               | 17                        | 7 (41.2%)  | 10 (58.8%) |                 |
| T3               | 44                        | 29 (65.9%) | 15 (34.1%) |                 |
| T4               | 13                        | 7 (53.8%)  | 6 (46.2%)  |                 |
| N classification |                           |            |            | 0.049           |
| N0               | 40                        | 26 (65%)   | 14 (35%)   |                 |
| N1               | 29                        | 14 (48.3%) | 15 (51.7%) |                 |
| N2               | 19                        | 6 (31.6%)  | 13 (68.4%) |                 |
| M classification |                           |            |            | 0.002           |
| M0               | 80                        | 46 (57.5%) | 34 (42.5%) |                 |
| M1               | 8                         | 0 (0%)     | 8 (100%)   |                 |
| * $\chi^2$ test  |                           |            |            |                 |
